# Supplementary material for: The CXCR4/CXCR7/SDF-1 pathway contributes to the pathogenesis of Shiga toxin–associated hemolytic uremic syndrome in humans and mice
Source: JCI journal article supplement (doi:10.1172/jci57313), 2012-01-09
Supplement: sd1 [file 1]

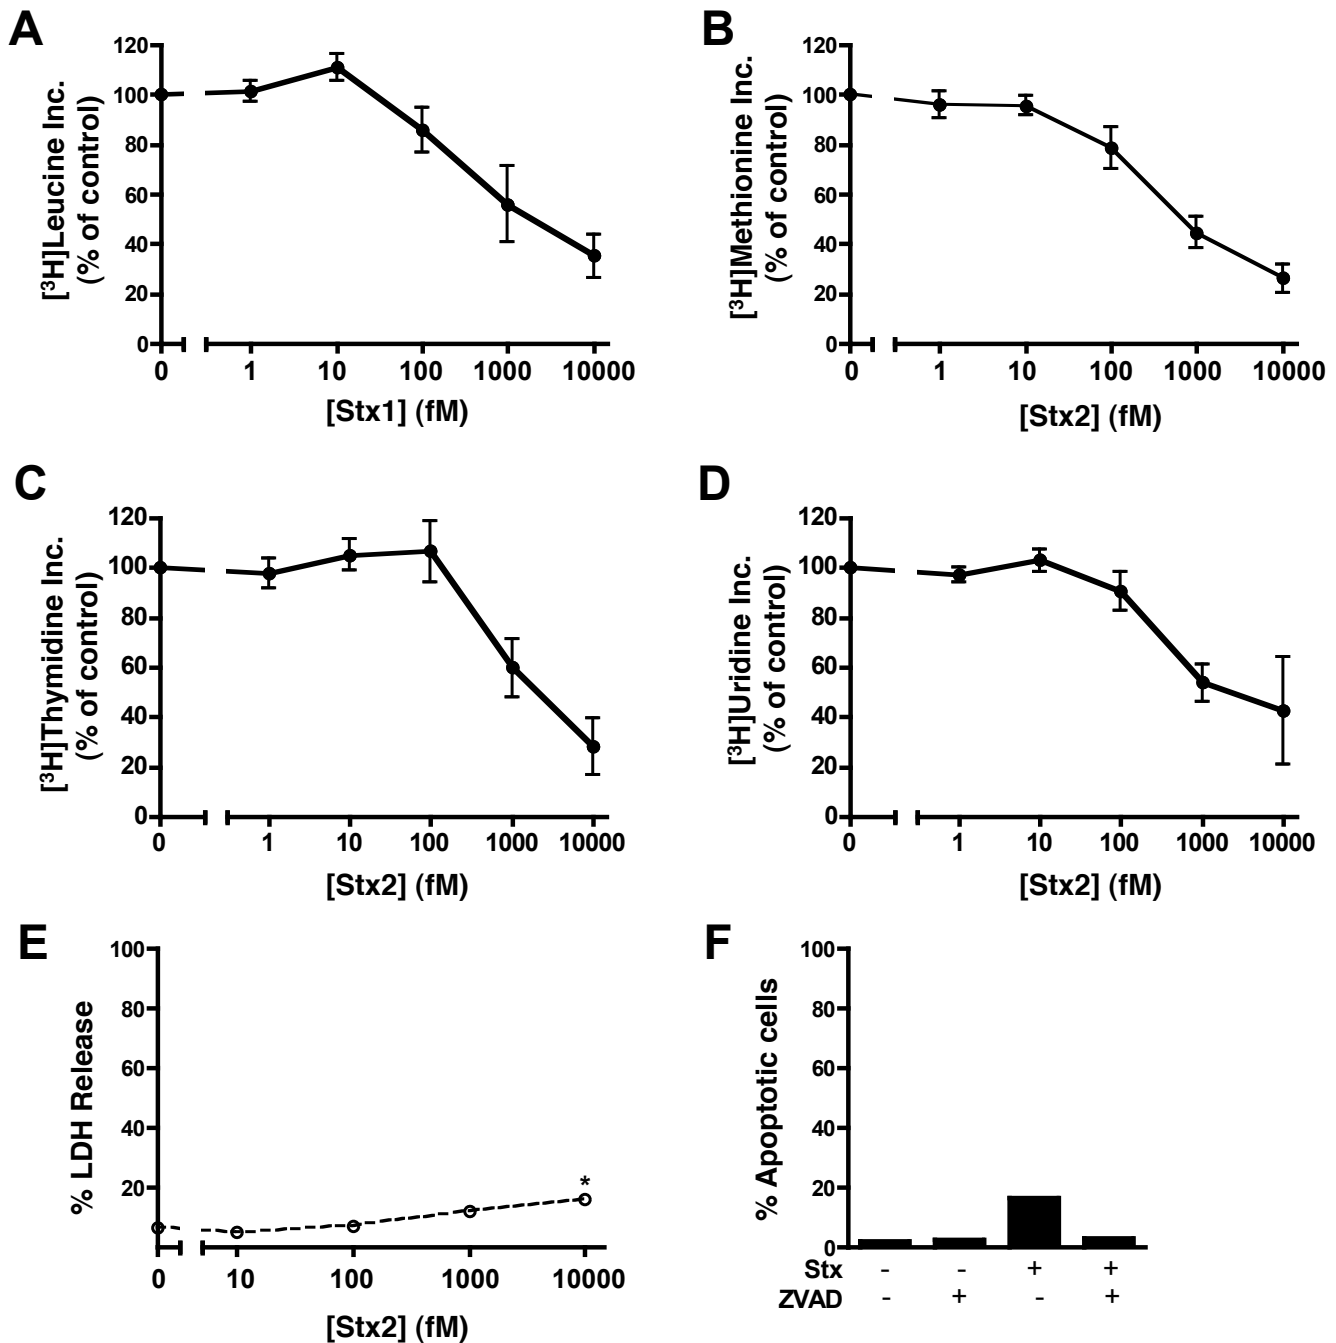

**Supplementary Figure 1: Effects of Shiga toxins on endothelial cell metabolism and survival.** (A) HMVEC were treated with vehicle or the indicated concentrations of Stx1 for 24 h. One hour before harvest, cells were labeled with 1  $\mu$ Ci [ $^3$ H]leucine to assess de novo protein synthesis. (B) HMVEC were treated with the indicated concentrations of Stx2 for 24 h. One hour before harvest, cells were labeled with 1  $\mu$ Ci [ $^3$ H]methionine as an alternate measure of protein synthesis. A representative experiment is shown. (C & D) HMVEC were treated with the Stx2 for 24 h and labeled with (C) [ $^3$ H]thymidine or (D) [ $^3$ H]uridine to assess DNA and RNA synthesis, respectively. Shown are the means  $\pm$  SEM of at least 3 experiments, triplicate determinations, unless otherwise stated. (E) HMVEC were treated with the indicated concentrations of Stx for 24 h, and cell membrane integrity was assessed by LDH release. % LDH release was calculated as a percentage of the completely lysed positive control. \* $p < 0.05$  (F) HMVEC were stained with Annexin V to determine the level of apoptosis following 24 h treatment with 1000fM Stx, in the presence or absence of the apoptosis inhibitor, ZVAD. A representative experiment is shown.

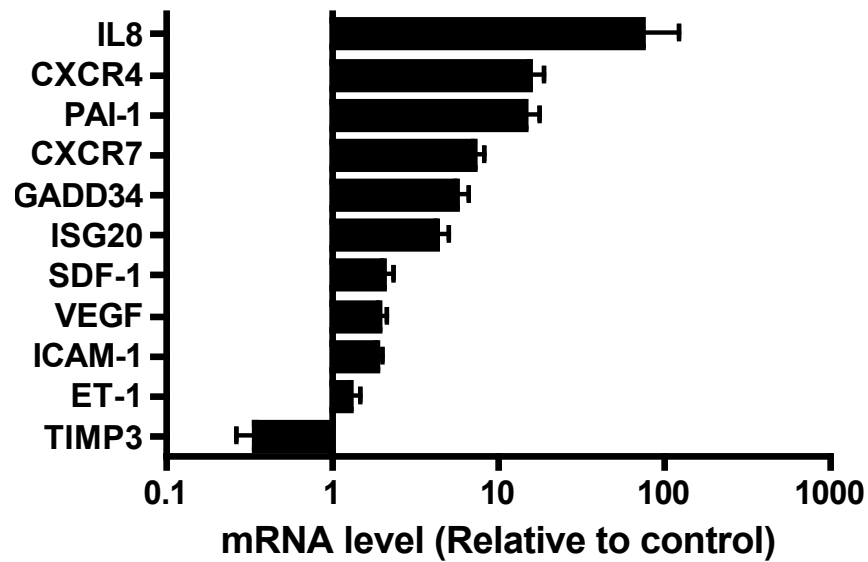

**Supplementary Figure 2: Validation of microarray results.** Microarray results were independently confirmed by qRT-PCR for a subset of 11 genes. Genes among the highest and lowest absolute fold-changes were studied, as were both up- and down-regulated genes. Note that ET-1 did not exhibit increased expression in the microarrays, nor by qRT-PCR under these treatment conditions (10 fM Stx2, 24 h). Shown are the means  $\pm$  SEM of at least 3 experiments.

## TNF

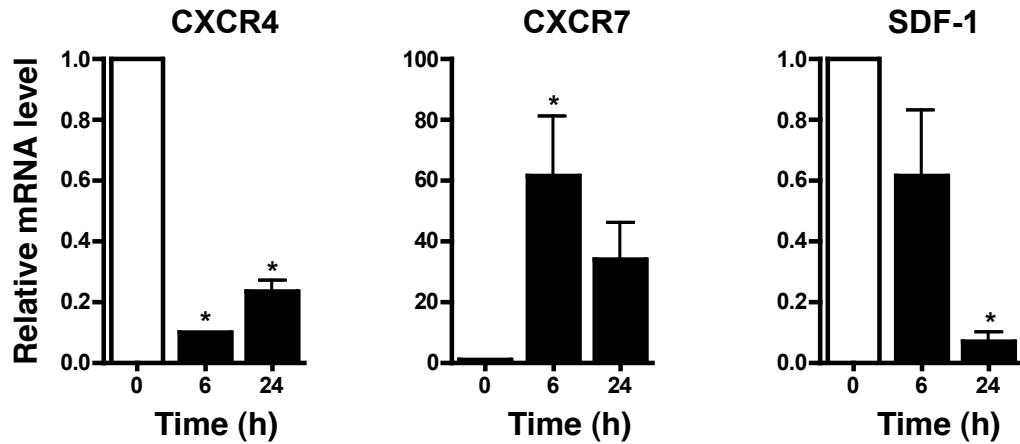

**Supplementary Figure 3: Shiga toxins have unique effects on the CXCR4/CXCR7/SDF-1 pathway compared to other classic endothelial stimuli.** HMVEC were treated with  $\text{TNF}\alpha$  (10 ng/ml) for 6 h or 24 h, followed by qRT-PCR to determine its effects on this pathway. Data are normalized to GAPDH and 18S and shown relative to vehicle-treated cells. The mean  $\pm$  SEM of 4 independent experiments is shown. \*  $p < 0.05$  vs vehicle

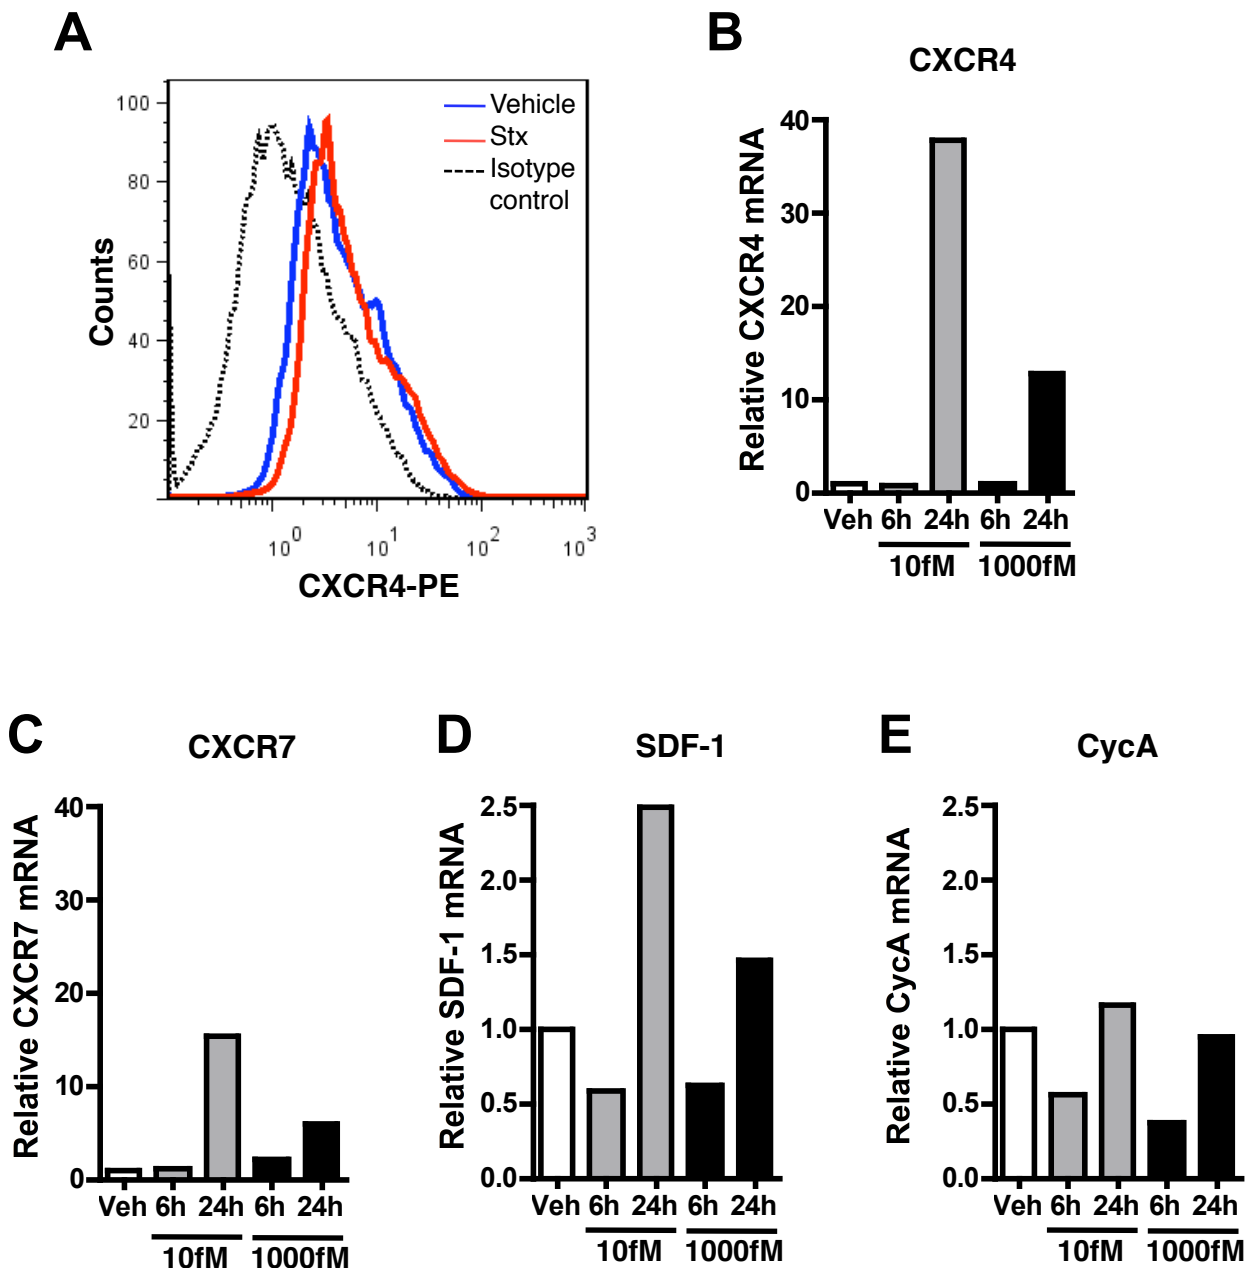

**Supplementary Figure 4: Effect of Shiga toxin on CXCR4 protein expression and steady-state mRNA levels in polyribosome studies.** (A) HMVEC were treated with 10 fM Stx for 48 h and CXCR4 was detected by flow cytometry. HMVEC were treated with the indicated concentrations of Stx for 6 h or 24 h. mRNA levels (B) CXCR4, (C) CXCR7, (D) SDF-1 and (E) cyclophilin A were quantitated by qRT-PCR and normalized to 18S. A representative experiment is shown.

## Bone Marrow

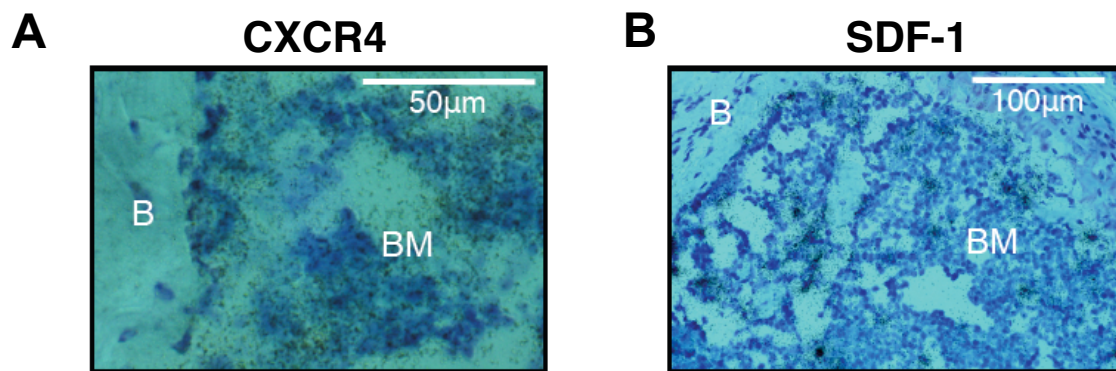

**Supplementary Figure 5: In vivo CXCR4 and SDF-1 bone marrow expression.** mRNA in situ hybridizations were performed on CAST/Ei mice treated with PBS or Stx. <sup>35</sup>S-labelled antisense riboprobes were used to detect **(A)** CXCR4 and **(B)** SDF-1 transcripts.

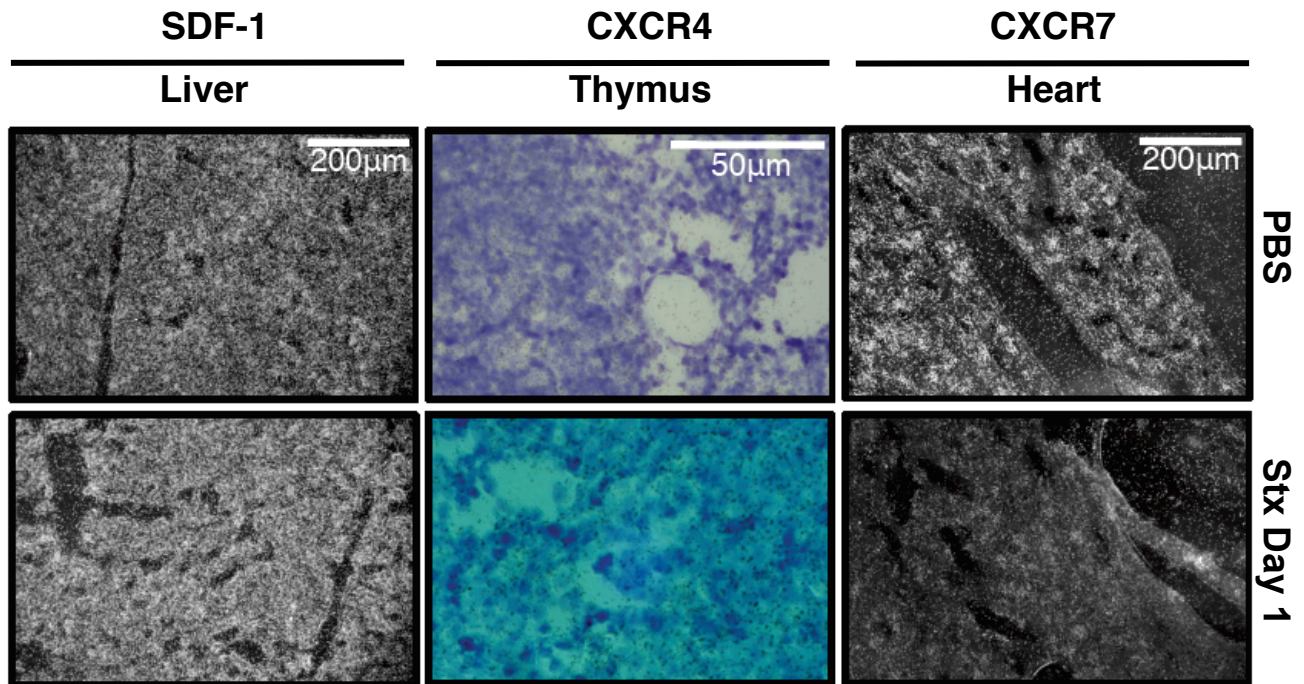

**Supplementary Figure 6: Shiga toxin challenge causes dysregulation of the CXCR4/CXCR7/SDF-1 axis in vivo. (A)** cRNA in situ hybridizations were performed using <sup>35</sup>S-labelled antisense riboprobes for SDF-1, CXCR4, and CXCR7. By 24 h after Stx injection (2400 pg/g) , SDF-1 production was increased in the liver, CXCR4 expression is up-regulated in the thymus. CXCR7 expression is reduced in the heart.

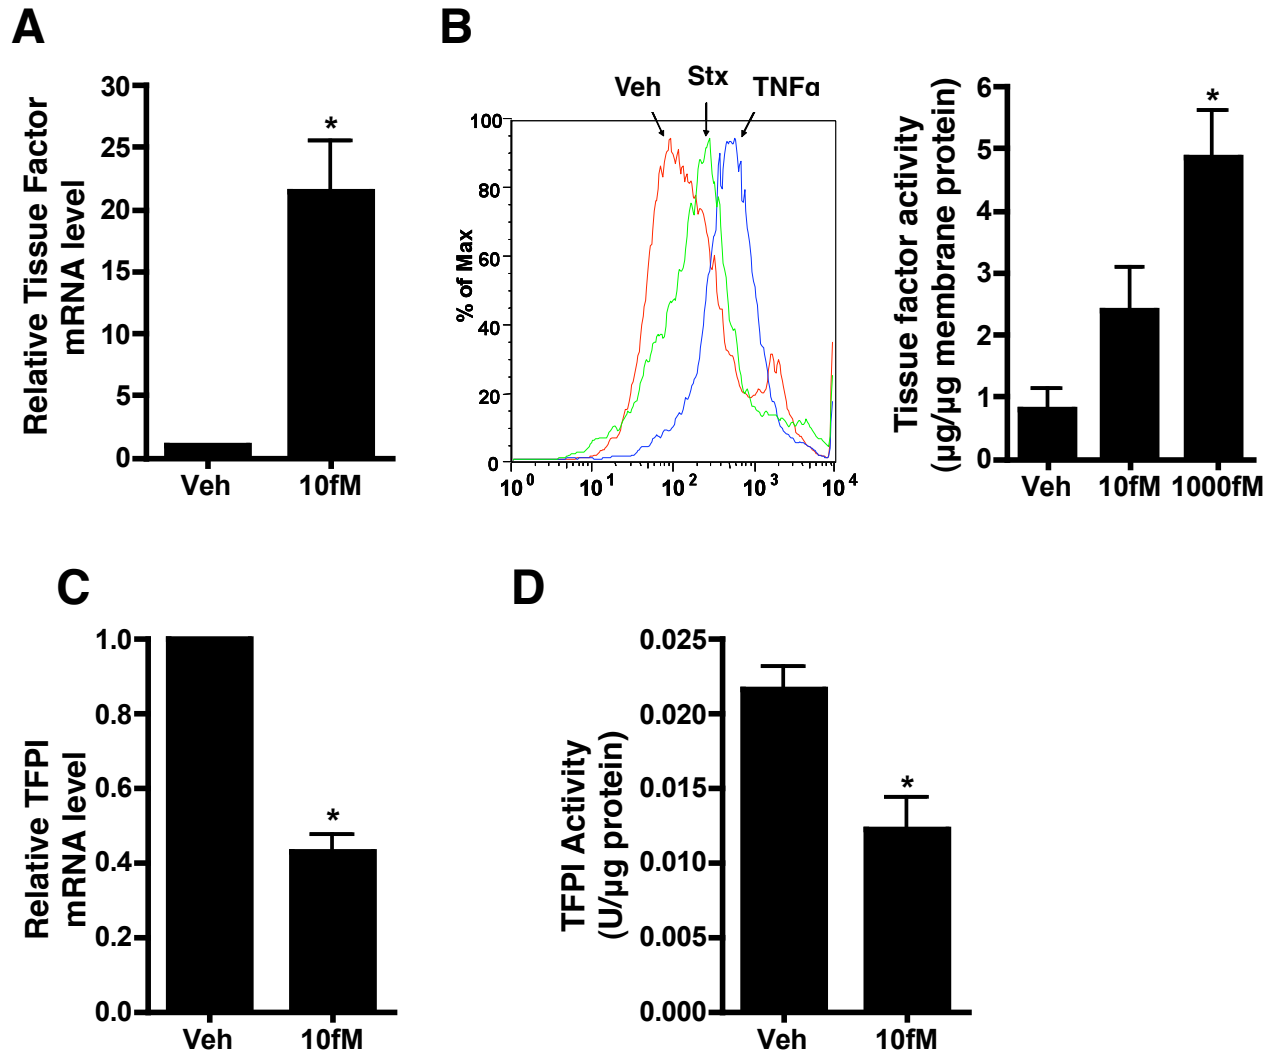

**Supplementary Figure 7: Shiga toxin stimulates increased tissue factor expression and activity and decreased expression and activity of tissue factor pathway inhibitor.** (A) Tissue factor mRNA levels were measured in HMVEC treated with Stx using qRT-PCR. (B) Tissue factor protein expression was increased on the surface of HMVEC exposed to Stx (1000 fM, 24 h), as determined by flow cytometry (left panel). Tissue factor activity in cell membranes increased in Stx-treated cells (right panel). (C) Stx caused a reduction in TFPI mRNA levels, determined using qRT-PCR. (D) TFPI activity decreased in membrane fractions of HMVEC following Stx exposure. The mean  $\pm$  SEM is shown from at least 3 independent experiments. \*  $p < 0.05$  compared to vehicle-treated cells

Supplementary Table 1. Shown is a list of differentially expressed genes in Stx-treated (10 fM, 24 h) vs vehicle-treated cells (n = 6). All genes listed displayed  $\geq 2$ -fold change in expression calculated by at least one of the 13 pre-processing strategies used. Fold changes shown here were calculated using the mmgMOS algorithm.

| Gene<br>Symbol | Gene Title                                                                                | Fold<br>change |
|----------------|-------------------------------------------------------------------------------------------|----------------|
| LIF            | leukemia inhibitory factor (cholinergic differentiation factor)                           | 162.06         |
| IL8            | interleukin 8                                                                             | 132.64         |
| STC1           | stanniocalcin 1                                                                           | 73.97          |
| STC2           | stanniocalcin 2                                                                           | 34.01          |
| ATF3           | activating transcription factor 3                                                         | 25.88          |
| SLC6A15        | solute carrier family 6, member 15                                                        | 25.19          |
| DUSP1          | dual specificity phosphatase 1                                                            | 20.26          |
| RRP12          | ribosomal RNA processing 12 homolog (S. cerevisiae)                                       | 19.58          |
| <b>CXCR4</b>   | <b>chemokine (C-X-C motif) receptor 4</b>                                                 | <b>16.50</b>   |
| DUSP10         | dual specificity phosphatase 10                                                           | 15.87          |
| ISG20          | interferon stimulated exonuclease gene 20kDa                                              | 10.93          |
| TRAF1          | TNF receptor-associated factor 1                                                          | 9.85           |
| PMAIP1         | phorbol-12-myristate-13-acetate-induced protein 1                                         | 9.37           |
| FOXF1          | forkhead box F1                                                                           | 7.95           |
| SQSTM1         | sequestosome 1                                                                            | 7.83           |
| PLK3           | polo-like kinase 3 (Drosophila)                                                           | 7.76           |
| SNF1LK         | SNF1-like kinase                                                                          | 7.73           |
| <b>CXCR7</b>   | <b>chemokine (C-X-C motif) receptor 7</b>                                                 | <b>7.13</b>    |
| RRAD           | Ras-related associated with diabetes                                                      | 6.86           |
| HDAC9          | histone deacetylase 9                                                                     | 6.82           |
| STYK1          | serine/threonine/tyrosine kinase 1                                                        | 6.59           |
| NIP7           | nuclear import 7 homolog (S. cerevisiae)                                                  | 6.51           |
| GDF15          | growth differentiation factor 15                                                          | 6.42           |
| ZFP36          | zinc finger protein 36, C3H type, homolog (mouse)                                         | 6.37           |
| GAL            | galanin                                                                                   | 6.17           |
| BIRC3          | baculoviral IAP repeat-containing 3                                                       | 6.03           |
| NR4A2          | nuclear receptor subfamily 4, group A, member 2                                           | 5.65           |
| MGC5618        | hypothetical protein MGC5618                                                              | 5.62           |
| CREB5          | cAMP responsive element binding protein 5                                                 | 5.29           |
| RND1           | Rho family GTPase 1                                                                       | 5.29           |
| FOSL1          | FOS-like antigen 1                                                                        | 5.24           |
| KCNN2          | potassium intermediate/small conductance calcium-activated channel, subfamily N, member 2 | 5.17           |
| USP36          | ubiquitin specific peptidase 36                                                           | 5.04           |
| SLC7A11        | solute carrier family 7, (cationic amino acid transporter, y+ system) member 11           | 4.98           |
| KLHL21         | kelch-like 21 (Drosophila)                                                                | 4.93           |
| NR1D1 ///      | thyroid hormone receptor, alpha (erythroblastic leukemia viral (v-erb-a)                  |                |
| THRA           | oncogene homolog, avian) /// nuclear receptor subfamily 1, group D, member 1              | 4.77           |
| TNFRSF12A      | tumor necrosis factor receptor superfamily, member 12A                                    | 4.75           |
| PAK1IP1        | PAK1 interacting protein 1                                                                | 4.73           |
| PPP1R15A       | protein phosphatase 1, regulatory (inhibitor) subunit 15A                                 | 4.53           |
| HLX1           | H2.0-like homeobox 1 (Drosophila)                                                         | 4.46           |
| SOD2           | superoxide dismutase 2, mitochondrial                                                     | 4.42           |
| EXOSC2         | exosome component 2                                                                       | 4.29           |
| KLF6           | Kruppel-like factor 6                                                                     | 4.23           |
| IFRD1          | interferon-related developmental regulator 1                                              | 4.18           |
| CXCL2          | chemokine (C-X-C motif) ligand 2                                                          | 4.10           |



|               |                                                                                               |      |
|---------------|-----------------------------------------------------------------------------------------------|------|
| HEY1          | hairy/enhancer-of-split related with YRPW motif 1                                             | 4.01 |
| MMP10         | matrix metalloproteinase 10 (stromelysin 2)                                                   | 3.93 |
| NAV2          | neuron navigator 2                                                                            | 3.90 |
| BHLHB2        | basic helix-loop-helix domain containing, class B, 2                                          | 3.69 |
| DUSP5         | dual specificity phosphatase 5                                                                | 3.67 |
| ISG20L1       | interferon stimulated exonuclease gene 20kDa-like 1                                           | 3.61 |
| JUN           | jun oncogene                                                                                  | 3.52 |
| KLF5          | Kruppel-like factor 5 (intestinal)                                                            | 3.51 |
| DDIT3         | DNA-damage-inducible transcript 3                                                             | 3.44 |
| PISD          | phosphatidylserine decarboxylase                                                              | 3.41 |
| KIAA1199      | KIAA1199                                                                                      | 3.39 |
| CA2           | carbonic anhydrase II                                                                         | 3.37 |
| RGS20         | regulator of G-protein signalling 20                                                          | 3.34 |
| PSG4          | pregnancy specific beta-1-glycoprotein 4                                                      | 3.33 |
| H2AFJ         | H2A histone family, member J                                                                  | 3.32 |
| PDE3A         | phosphodiesterase 3A, cGMP-inhibited                                                          | 3.31 |
| KIAA0999      | KIAA0999 protein                                                                              | 3.30 |
| C3orf52       | chromosome 3 open reading frame 52                                                            | 3.30 |
| HK2           | hexokinase 2                                                                                  | 3.28 |
| SSTR2         | somatostatin receptor 2                                                                       | 3.26 |
| TRIB1         | tribbles homolog 1 (Drosophila)                                                               | 3.25 |
| NUPL1         | nucleoporin like 1                                                                            | 3.21 |
| FEM1C         | fem-1 homolog c (C. elegans)                                                                  | 3.16 |
| IL4R          | interleukin 4 receptor                                                                        | 3.14 |
| PHLDA2        | pleckstrin homology-like domain, family A, member 2                                           | 3.14 |
| NEDD4L        | neural precursor cell expressed, developmentally down-regulated 4-like                        | 3.13 |
| CCNA1         | cyclin A1                                                                                     | 3.10 |
| PLAUR         | plasminogen activator, urokinase receptor                                                     | 3.09 |
| LOC653390 /// |                                                                                               |      |
| LOC730092 /// | RRN3 RNA polymerase I transcription factor homolog (S. cerevisiae) ///                        |      |
| RRN3          | RNA polymerase I transcription factor homolog (S. cerevisiae) pseudogene                      | 3.09 |
| MCL1          | myeloid cell leukemia sequence 1 (BCL2-related)                                               | 3.08 |
| KIAA0692      | KIAA0692                                                                                      | 3.06 |
| RASSF1        | Ras association (RalGDS/AF-6) domain family 1                                                 | 3.03 |
| SLC7A5        | solute carrier family 7 (cationic amino acid transporter, y+ system), member 5                | 3.02 |
| HRH1          | histamine receptor H1                                                                         | 3.02 |
| ZNF267        | zinc finger protein 267                                                                       | 3.00 |
| DUSP8         | dual specificity phosphatase 8                                                                | 2.99 |
| ADFP          | adipose differentiation-related protein                                                       | 2.98 |
|               | serpin peptidase inhibitor, clade E (nexin, plasminogen activator inhibitor type 1), member 1 | 2.97 |
| SERPINE1      |                                                                                               | 2.97 |
| ATF4          | activating transcription factor 4 (tax-responsive enhancer element B67)                       | 2.89 |
|               | Cbp/p300-interacting transactivator, with Glu/Asp-rich carboxy-terminal domain, 2             | 2.88 |
| CITED2        |                                                                                               | 2.88 |
| ODC1          | ornithine decarboxylase 1                                                                     | 2.86 |
| ARG2          | arginase, type II                                                                             | 2.86 |
| IRS2          | insulin receptor substrate 2                                                                  | 2.84 |
| VEGFA         | vascular endothelial growth factor A                                                          | 2.83 |
| PDLIM4        | PDZ and LIM domain 4                                                                          | 2.82 |
| OSGIN1        | oxidative stress induced growth inhibitor 1                                                   | 2.76 |
| EGR1          | early growth response 1                                                                       | 2.73 |
| ATF5          | activating transcription factor 5                                                             | 2.73 |
| PTGER4        | prostaglandin E receptor 4 (subtype EP4)                                                      | 2.70 |
| PPP1R10       | protein phosphatase 1, regulatory (inhibitor) subunit 10                                      | 2.69 |
| HIST1H4H      | histone cluster 1, H4h                                                                        | 2.69 |
| CYLD          | cylindromatosis (turban tumor syndrome)                                                       | 2.68 |

|              |                                                                                                                                  |      |
|--------------|----------------------------------------------------------------------------------------------------------------------------------|------|
| IRF8         | interferon regulatory factor 8                                                                                                   | 2.67 |
| SAMD4A       | sterile alpha motif domain containing 4A                                                                                         | 2.67 |
| TTC4         | tetratricopeptide repeat domain 4                                                                                                | 2.66 |
| KIAA0701     | KIAA0701 protein                                                                                                                 | 2.65 |
| EXOSC4       | exosome component 4                                                                                                              | 2.65 |
| DDX27        | DEAD (Asp-Glu-Ala-Asp) box polypeptide 27                                                                                        | 2.65 |
| ARMC8        | armadillo repeat containing 8                                                                                                    | 2.60 |
| PEO1         | progressive external ophthalmoplegia 1                                                                                           | 2.59 |
| HIST1H1C     | histone cluster 1, H1c                                                                                                           | 2.55 |
| LOC441938    | similar to Signal-regulatory protein gamma precursor (Signal-regulatory protein beta-2) (SIRP-beta-2) (SIRP-b2) (CD172g antigen) | 2.55 |
| FKBP4        | FK506 binding protein 4, 59kDa                                                                                                   | 2.53 |
| FILIP1L      | filamin A interacting protein 1-like                                                                                             | 2.52 |
| MGC14376     | hypothetical protein MGC14376                                                                                                    | 2.50 |
| N6AMT1       | N-6 adenine-specific DNA methyltransferase 1 (putative)                                                                          | 2.48 |
|              | solute carrier family 3 (activators of dibasic and neutral amino acid transport), member 2                                       | 2.46 |
| SLC3A2       |                                                                                                                                  | 2.46 |
| SLC6A4       | solute carrier family 6 (neurotransmitter transporter, serotonin), member 4                                                      | 2.44 |
| MYLK         | myosin, light chain kinase                                                                                                       | 2.43 |
| PUS1         | pseudouridylate synthase 1                                                                                                       | 2.42 |
| C13orf15     | chromosome 13 open reading frame 15                                                                                              | 2.42 |
| C14orf138    | chromosome 14 open reading frame 138                                                                                             | 2.42 |
| ARSJ         | arylsulfatase family, member J                                                                                                   | 2.41 |
| AKAP2 ///    |                                                                                                                                  |      |
| PALM2-       |                                                                                                                                  |      |
| AKAP2        | A kinase (PRKA) anchor protein 2 /// PALM2-AKAP2 protein                                                                         | 2.40 |
| DKK1         | dickkopf homolog 1 (Xenopus laevis)                                                                                              | 2.40 |
| SAT1         | spermidine/spermine N1-acetyltransferase 1                                                                                       | 2.40 |
| THBD         | thrombomodulin                                                                                                                   | 2.39 |
| BCL3         | B-cell CLL/lymphoma 3                                                                                                            | 2.39 |
| JUNB         | jun B proto-oncogene                                                                                                             | 2.38 |
| C10orf28     | chromosome 10 open reading frame 28                                                                                              | 2.38 |
| CDYL         | chromodomain protein, Y-like                                                                                                     | 2.37 |
| SLC16A7      | solute carrier family 16, member 7 (monocarboxylic acid transporter 2)                                                           | 2.37 |
| RRS1         | RRS1 ribosome biogenesis regulator homolog (S. cerevisiae)                                                                       | 2.36 |
| ZBTB10       | zinc finger and BTB domain containing 10                                                                                         | 2.35 |
| SBNO2        | strawberry notch homolog 2 (Drosophila)                                                                                          | 2.34 |
| PPRC1        | peroxisome proliferator-activated receptor gamma, coactivator-related 1                                                          | 2.32 |
| HSPC111      | hypothetical protein HSPC111                                                                                                     | 2.32 |
| ESM1         | endothelial cell-specific molecule 1                                                                                             | 2.29 |
| SFRS10       | splicing factor, arginine/serine-rich 10 (transformer 2 homolog, Drosophila)                                                     | 2.29 |
| SPRY1        | sprouty homolog 1, antagonist of FGF signaling (Drosophila)                                                                      | 2.29 |
| C13orf27     | chromosome 13 open reading frame 27                                                                                              | 2.28 |
| FARSA        | phenylalanyl-tRNA synthetase, alpha subunit                                                                                      | 2.28 |
| DNAJC17      | DnaJ (Hsp40) homolog, subfamily C, member 17                                                                                     | 2.28 |
| C11orf17 /// |                                                                                                                                  |      |
| NUAK2        | chromosome 11 open reading frame 17 /// NUAK family, SNF1-like kinase, 2                                                         | 2.28 |
| ITPKB        | inositol 1,4,5-trisphosphate 3-kinase B                                                                                          | 2.27 |
| CHIC2        | cysteine-rich hydrophobic domain 2                                                                                               | 2.26 |
| TSC22D2      | TSC22 domain family, member 2                                                                                                    | 2.25 |
| MLF1         | Myeloid leukemia factor 1                                                                                                        | 2.25 |
| TSSC4        | tumor suppressing subtransferable candidate 4                                                                                    | 2.25 |
| C10orf88     | chromosome 10 open reading frame 88                                                                                              | 2.24 |
| CEP72        | centrosomal protein 72kDa                                                                                                        | 2.24 |
| FCN2         | ficolin (collagen/fibrinogen domain containing lectin) 2 (hucolin)                                                               | 2.23 |
| TACC2        | transforming, acidic coiled-coil containing protein 2                                                                            | 2.23 |

|               |                                                                                                                                    |             |
|---------------|------------------------------------------------------------------------------------------------------------------------------------|-------------|
| MAFF          | v-maf musculoaponeurotic fibrosarcoma oncogene homolog F (avian)                                                                   | 2.23        |
| URB1          | URB1 ribosome biogenesis 1 homolog (S. cerevisiae)                                                                                 | 2.22        |
| PBEF1         | pre-B-cell colony enhancing factor 1                                                                                               | 2.22        |
| DDX21         | DEAD (Asp-Glu-Ala-Asp) box polypeptide 21                                                                                          | 2.21        |
| HMHA1         | histocompatibility (minor) HA-1                                                                                                    | 2.21        |
| WHSC2         | Wolf-Hirschhorn syndrome candidate 2                                                                                               | 2.20        |
| WTAP          | Wilms tumor 1 associated protein                                                                                                   | 2.20        |
| YRDC          | yrnC domain containing (E. coli)                                                                                                   | 2.20        |
| NFKB2         | nuclear factor of kappa light polypeptide gene enhancer in B-cells 2 (p49/p100)                                                    | 2.19        |
| RALA          | v-ral simian leukemia viral oncogene homolog A (ras related)                                                                       | 2.19        |
| CUL2          | cullin 2                                                                                                                           | 2.18        |
| GADD45B       | growth arrest and DNA-damage-inducible, beta                                                                                       | 2.18        |
| SGK           | serum/glucocorticoid regulated kinase                                                                                              | 2.17        |
| SEC14L1       | SEC14-like 1 (S. cerevisiae)                                                                                                       | 2.16        |
| PSG6          | pregnancy specific beta-1-glycoprotein 6                                                                                           | 2.16        |
| STARD13       | START domain containing 13                                                                                                         | 2.16        |
| IBRDC3        | IBR domain containing 3                                                                                                            | 2.16        |
| SBF1          | SET binding factor 1                                                                                                               | 2.16        |
| MYC           | v-myc myelocytomatosis viral oncogene homolog (avian)                                                                              | 2.15        |
| HUS1          | HUS1 checkpoint homolog (S. pombe)                                                                                                 | 2.15        |
| ATPBD1B       | ATP binding domain 1 family, member B                                                                                              | 2.15        |
| FOSL2         | FOS-like antigen 2                                                                                                                 | 2.15        |
| TIPIN         | TIMELESS interacting protein                                                                                                       | 2.15        |
| KIAA0040      | KIAA0040                                                                                                                           | 2.14        |
| PNO1          | partner of NOB1 homolog (S. cerevisiae)                                                                                            | 2.14        |
| BNIP1         | BCL2/adenovirus E1B 19kDa interacting protein 1                                                                                    | 2.14        |
| BYSL          | bystin-like                                                                                                                        | 2.13        |
| CEBPB         | CCAAT/enhancer binding protein (C/EBP), beta                                                                                       | 2.12        |
| CEP170        | centrosomal protein 170kDa                                                                                                         | 2.12        |
| IL32          | interleukin 32                                                                                                                     | 2.11        |
| AATK          | apoptosis-associated tyrosine kinase                                                                                               | 2.11        |
| ANKRD1        | ankyrin repeat domain 1 (cardiac muscle)                                                                                           | 2.11        |
| CX3CL1        | chemokine (C-X3-C motif) ligand 1                                                                                                  | 2.11        |
| HSPA9         | heat shock 70kDa protein 9 (mortalin)                                                                                              | 2.09        |
| KLF10         | Kruppel-like factor 10                                                                                                             | 2.09        |
| RAB32         | RAB32, member RAS oncogene family                                                                                                  | 2.09        |
| CDC42EP1      | CDC42 effector protein (Rho GTPase binding) 1                                                                                      | 2.08        |
| P2RX7         | purinergic receptor P2X, ligand-gated ion channel, 7                                                                               | 2.08        |
| TFE3          | transcription factor binding to IGHM enhancer 3                                                                                    | 2.08        |
| ZNF202        | zinc finger protein 202                                                                                                            | 2.07        |
| PLAU          | plasminogen activator, urokinase                                                                                                   | 2.07        |
| MEF2A         | myocyte enhancer factor 2A                                                                                                         | 2.07        |
| C12orf24      | chromosome 12 open reading frame 24                                                                                                | 2.06        |
| TICAM1        | toll-like receptor adaptor molecule 1                                                                                              | 2.06        |
| RCL1          | RNA terminal phosphate cyclase-like 1                                                                                              | 2.06        |
| JMJD3         | jumonji domain containing 3                                                                                                        | 2.06        |
| IER2          | immediate early response 2                                                                                                         | 2.05        |
| ELL           | elongation factor RNA polymerase II                                                                                                | 2.05        |
| MRT04         | mRNA turnover 4 homolog (S. cerevisiae)                                                                                            | 2.05        |
| RELB          | v-rel reticuloendotheliosis viral oncogene homolog B, nuclear factor of kappa light polypeptide gene enhancer in B-cells 3 (avian) | 2.04        |
| NOL1          | nucleolar protein 1, 120kDa                                                                                                        | 2.04        |
| CEBPD         | CCAAT/enhancer binding protein (C/EBP), delta                                                                                      | 2.03        |
| <b>CXCL12</b> | <b>chemokine (C-X-C motif) ligand 12 (stromal cell-derived factor 1)</b>                                                           | <b>2.03</b> |
| LEPREL1       | leprecan-like 1                                                                                                                    | 2.02        |
| RNMTL1        | RNA methyltransferase like 1                                                                                                       | 2.01        |

|           |                                                                                                                         |      |
|-----------|-------------------------------------------------------------------------------------------------------------------------|------|
| HMOX1     | heme oxygenase (decycling) 1                                                                                            | 2.00 |
| TTF2      | transcription termination factor, RNA polymerase II                                                                     | 2.00 |
| TNFRSF4   | tumor necrosis factor receptor superfamily, member 4                                                                    | 2.00 |
| PAPD1     | PAP associated domain containing 1                                                                                      | 2.00 |
| KHDRBS3   | KH domain containing, RNA binding, signal transduction associated 3                                                     | 1.99 |
| BOP1 ///  |                                                                                                                         |      |
| LOC727967 | block of proliferation 1 /// similar to block of proliferation 1                                                        | 1.99 |
| WDR43     | WD repeat domain 43                                                                                                     | 1.99 |
| GBE1      | glucan (1,4-alpha-), branching enzyme 1 (glycogen branching enzyme, Andersen disease, glycogen storage disease type IV) | 1.98 |
| CHST2     | carbohydrate (N-acetylglucosamine-6-O) sulfotransferase 2                                                               | 1.98 |
| ZBTB43    | zinc finger and BTB domain containing 43                                                                                | 1.98 |
| GRPEL1    | GrpE-like 1, mitochondrial (E. coli)                                                                                    | 1.98 |
| CLCF1     | cardiotrophin-like cytokine factor 1                                                                                    | 1.98 |
| CBLL1     | Cas-Br-M (murine) ecotropic retroviral transforming sequence-like 1                                                     | 1.98 |
| KIF17     | kinesin family member 17                                                                                                | 1.98 |
| PFKFB3    | 6-phosphofructo-2-kinase/fructose-2,6-biphosphatase 3                                                                   | 1.97 |
| CCDC86    | coiled-coil domain containing 86                                                                                        | 1.97 |
| PER2      | period homolog 2 (Drosophila)                                                                                           | 1.97 |
| ZNF787    | zinc finger protein 787                                                                                                 | 1.97 |
| HIST1H2AC | histone cluster 1, H2ac                                                                                                 | 1.97 |
| KIAA0020  | KIAA0020                                                                                                                | 1.96 |
| NOL5A     | nucleolar protein 5A (56kDa with KKE/D repeat)                                                                          | 1.95 |
| LIN37     | lin-37 homolog (C. elegans)                                                                                             | 1.95 |
| WDR74     | WD repeat domain 74                                                                                                     | 1.95 |
| PPIF      | peptidylprolyl isomerase F (cyclophilin F)                                                                              | 1.94 |
| RGS17     | regulator of G-protein signalling 17                                                                                    | 1.94 |
| NNMT      | nicotinamide N-methyltransferase                                                                                        | 1.93 |
| RSL1D1    | ribosomal L1 domain containing 1                                                                                        | 1.93 |
| PCTK2     | PCTAIRE protein kinase 2                                                                                                | 1.93 |
| NARG1     | NMDA receptor regulated 1                                                                                               | 1.92 |
| H1FX      | H1 histone family, member X                                                                                             | 1.90 |
| SMAD3     | SMAD family member 3                                                                                                    | 1.90 |
|           | guanine nucleotide binding protein (G protein), alpha inhibiting activity                                               |      |
| GNAI3     | polypeptide 3                                                                                                           | 1.88 |
| UPP1      | uridine phosphorylase 1                                                                                                 | 1.88 |
| PKP2      | plakophilin 2                                                                                                           | 1.88 |
| AKAP12    | A kinase (PRKA) anchor protein (gravin) 12                                                                              | 1.88 |
| CEBPZ     | CCAAT/enhancer binding protein zeta                                                                                     | 1.87 |
| N4BP3     | Nedd4 binding protein 3                                                                                                 | 1.87 |
| TFB2M     | transcription factor B2, mitochondrial                                                                                  | 1.87 |
| ICAM1     | intercellular adhesion molecule 1 (CD54), human rhinovirus receptor                                                     | 1.86 |
| NOC4L     | nucleolar complex associated 4 homolog (S. cerevisiae)                                                                  | 1.86 |
| GBP1      | guanylate binding protein 1, interferon-inducible, 67kDa                                                                | 1.85 |
| TRMT1     | TRM1 tRNA methyltransferase 1 homolog (S. cerevisiae)                                                                   | 1.85 |
| C14orf172 | chromosome 14 open reading frame 172                                                                                    | 1.85 |
| TNFAIP3   | tumor necrosis factor, alpha-induced protein 3                                                                          | 1.84 |
| BAZ1A     | bromodomain adjacent to zinc finger domain, 1A                                                                          | 1.83 |
| RBM15     | RNA binding motif protein 15                                                                                            | 1.83 |
| ATP13A3   | ATPase type 13A3                                                                                                        | 1.83 |
| WDR13     | WD repeat domain 13                                                                                                     | 1.83 |
| SCN3B     | sodium channel, voltage-gated, type III, beta                                                                           | 1.82 |
| DDX56     | DEAD (Asp-Glu-Ala-Asp) box polypeptide 56                                                                               | 1.82 |
| MRPS2     | mitochondrial ribosomal protein S2                                                                                      | 1.82 |
|           | chemokine (C-X-C motif) ligand 1 (melanoma growth stimulating activity,                                                 |      |
| CXCL1     | alpha)                                                                                                                  | 1.81 |

|            |                                                                                                      |      |
|------------|------------------------------------------------------------------------------------------------------|------|
| CDK7       | cyclin-dependent kinase 7 (MO15 homolog, <i>Xenopus laevis</i> , cdk-activating kinase)              | 1.81 |
| NDUFB7     | NADH dehydrogenase (ubiquinone) 1 beta subcomplex, 7, 18kDa                                          | 1.81 |
| NFIL3      | nuclear factor, interleukin 3 regulated                                                              | 1.80 |
| SNAPC1     | small nuclear RNA activating complex, polypeptide 1, 43kDa                                           | 1.80 |
| PHLPPL     | PH domain and leucine rich repeat protein phosphatase-like                                           | 1.80 |
| GADD45A    | growth arrest and DNA-damage-inducible, alpha                                                        | 1.79 |
| PLA2G4C    | phospholipase A2, group IVC (cytosolic, calcium-independent)                                         | 1.79 |
| NOLC1      | nucleolar and coiled-body phosphoprotein 1                                                           | 1.79 |
| H3F3B      | H3 histone, family 3B (H3.3B)                                                                        | 1.79 |
| RRP15      | ribosomal RNA processing 15 homolog ( <i>S. cerevisiae</i> )                                         | 1.79 |
| C19orf22   | chromosome 19 open reading frame 22                                                                  | 1.79 |
| NP         | nucleoside phosphorylase                                                                             | 1.78 |
| OSBPL3     | oxysterol binding protein-like 3                                                                     | 1.78 |
| BRD2       | bromodomain containing 2                                                                             | 1.78 |
| CUGBP2     | CUG triplet repeat, RNA binding protein 2                                                            | 1.77 |
| NPC1       | Niemann-Pick disease, type C1                                                                        | 1.77 |
| MPHOSPH6   | M-phase phosphoprotein 6                                                                             | 1.77 |
| RASIP1     | Ras interacting protein 1                                                                            | 1.77 |
| CHORDC1    | cysteine and histidine-rich domain (CHORD)-containing 1                                              | 1.76 |
| SPATA5L1   | spermatogenesis associated 5-like 1                                                                  | 1.76 |
| F2RL1      | coagulation factor II (thrombin) receptor-like 1                                                     | 1.75 |
| HIST2H2AA3 |                                                                                                      |      |
| ///        |                                                                                                      |      |
| HIST2H2AA4 | histone cluster 2, H2aa3 /// histone cluster 2, H2aa4                                                | 1.75 |
| NAT9       | N-acetyltransferase 9                                                                                | 1.74 |
| BCL2L1     | BCL2-like 1                                                                                          | 1.74 |
| CFLAR      | CASP8 and FADD-like apoptosis regulator                                                              | 1.74 |
| CASP1      | caspase 1, apoptosis-related cysteine peptidase (interleukin 1, beta, convertase)                    | 1.73 |
| MTHFD2     | methylenetetrahydrofolate dehydrogenase (NADP+ dependent) 2, methenyltetrahydrofolate cyclohydrolase | 1.72 |
| RRAS2      | related RAS viral (r-ras) oncogene homolog 2                                                         | 1.72 |
| PAQR3      | progesterone and adipoQ receptor family member III                                                   | 1.72 |
| KRT18      | keratin 18                                                                                           | 1.70 |
| IRF1       | interferon regulatory factor 1                                                                       | 1.70 |
| C8orf33    | chromosome 8 open reading frame 33                                                                   | 1.69 |
| TXNRD1     | thioredoxin reductase 1                                                                              | 1.68 |
| C1orf163   | chromosome 1 open reading frame 163                                                                  | 1.68 |
| TMEM70     | transmembrane protein 70                                                                             | 1.67 |
| TPK1       | thiamin pyrophosphokinase 1                                                                          | 1.67 |
| DOCK4      | dedicator of cytokinesis 4                                                                           | 1.65 |
| NGDN       | neuroguidin, EIF4E binding protein                                                                   | 1.64 |
| TXNL4B     | thioredoxin-like 4B                                                                                  | 1.64 |
| NQO1       | NAD(P)H dehydrogenase, quinone 1                                                                     | 1.63 |
| SLC16A3    | solute carrier family 16, member 3 (monocarboxylic acid transporter 4)                               | 1.63 |
| BTG3       | BTG family, member 3                                                                                 | 1.63 |
| HIST2H2BE  | histone cluster 2, H2be                                                                              | 1.62 |
| RNF111     | ring finger protein 111                                                                              | 1.61 |
| C20orf111  | Chromosome 20 open reading frame 111                                                                 | 1.61 |
| SYNJ2      | synaptojanin 2                                                                                       | 1.60 |
| ASRGL1     | asparaginase like 1                                                                                  | 1.60 |
| EMG1       | EMG1 nucleolar protein homolog ( <i>S. cerevisiae</i> )                                              | 1.59 |
| RPP40      | ribonuclease P 40kDa subunit                                                                         | 1.57 |
| PLCL2      | phospholipase C-like 2                                                                               | 1.57 |
| ZNF259     | zinc finger protein 259                                                                              | 1.56 |

|           |                                                                                                                                   |      |
|-----------|-----------------------------------------------------------------------------------------------------------------------------------|------|
| CGRRF1    | cell growth regulator with ring finger domain 1                                                                                   | 1.56 |
| EIF1      | eukaryotic translation initiation factor 1                                                                                        | 1.56 |
| ING3      | inhibitor of growth family, member 3                                                                                              | 1.55 |
| RAE1      | RAE1 RNA export 1 homolog (S. pombe)                                                                                              | 1.55 |
| MRPS30    | mitochondrial ribosomal protein S30                                                                                               | 1.51 |
| PVR       | poliovirus receptor                                                                                                               | 1.49 |
| GCH1      | GTP cyclohydrolase 1 (dopa-responsive dystonia)                                                                                   | 1.47 |
| SLC1A4    | solute carrier family 1 (glutamate/neutral amino acid transporter), member 4                                                      | 1.44 |
| SLC9A1    | solute carrier family 9 (sodium/hydrogen exchanger), member 1 (antiporter, Na <sup>+</sup> /H <sup>+</sup> , amiloride sensitive) | 1.31 |
| GMEB2     | glucocorticoid modulatory element binding protein 2                                                                               | 1.28 |
| SLC25A37  | solute carrier family 25, member 37                                                                                               | 1.23 |
| ACTN1     | actinin, alpha 1                                                                                                                  | 1.14 |
| SMC2      | structural maintenance of chromosomes 2                                                                                           | 1.10 |
| ADAM19    | ADAM metallopeptidase domain 19 (meltrin beta)                                                                                    | 0.89 |
| SLC2A8    | solute carrier family 2, (facilitated glucose transporter) member 8                                                               | 0.73 |
| RUNX1T1   | runx-related transcription factor 1; translocated to, 1 (cyclin D-related)                                                        | 0.69 |
| GALC      | galactosylceramidase                                                                                                              | 0.66 |
| RAB6B     | RAB6B, member RAS oncogene family                                                                                                 | 0.66 |
| PPAP2B    | phosphatidic acid phosphatase type 2B                                                                                             | 0.65 |
| CDC2L6    | cell division cycle 2-like 6 (CDK8-like)                                                                                          | 0.65 |
| FRY       | furry homolog (Drosophila)                                                                                                        | 0.64 |
| SCNN1B    | sodium channel, nonvoltage-gated 1, beta (Liddle syndrome)                                                                        | 0.64 |
| CDKN1C    | cyclin-dependent kinase inhibitor 1C (p57, Kip2)                                                                                  | 0.64 |
| C1orf38   | chromosome 1 open reading frame 38                                                                                                | 0.63 |
| RNASE4    | ribonuclease, RNase A family, 4                                                                                                   | 0.63 |
| OLFML3    | olfactomedin-like 3                                                                                                               | 0.63 |
| MAN1A1    | mannosidase, alpha, class 1A, member 1                                                                                            | 0.62 |
| KLHL4     | kelch-like 4 (Drosophila)                                                                                                         | 0.62 |
| P2RY5     | purinergic receptor P2Y, G-protein coupled, 5                                                                                     | 0.62 |
| CAT       | catalase                                                                                                                          | 0.61 |
| REEP1     | receptor accessory protein 1                                                                                                      | 0.60 |
| TIMP3     | TIMP metallopeptidase inhibitor 3 (Sorsby fundus dystrophy, pseudoinflammatory)                                                   | 0.59 |
| CCNG2     | cyclin G2                                                                                                                         | 0.59 |
| KLHL3     | kelch-like 3 (Drosophila)                                                                                                         | 0.59 |
| ALG12     | asparagine-linked glycosylation 12 homolog (S. cerevisiae, alpha-1,6-mannosyltransferase)                                         | 0.58 |
| DZIP3     | zinc finger DAZ interacting protein 3                                                                                             | 0.57 |
| ATG10     | ATG10 autophagy related 10 homolog (S. cerevisiae)                                                                                | 0.57 |
| VENTXP1   | VENT homeobox (Xenopus laevis) pseudogene 1                                                                                       | 0.57 |
| GUCY1A3   | guanylate cyclase 1, soluble, alpha 3                                                                                             | 0.57 |
| SNCAIP    | synuclein, alpha interacting protein (synphilin)                                                                                  | 0.56 |
| SPTLC2    | serine palmitoyltransferase, long chain base subunit 2                                                                            | 0.52 |
| METTL7A   | methyltransferase like 7A                                                                                                         | 0.52 |
| C10orf56  | chromosome 10 open reading frame 56                                                                                               | 0.52 |
| CD46      | CD46 molecule, complement regulatory protein                                                                                      | 0.51 |
| BTD       | biotinidase                                                                                                                       | 0.51 |
| MED28     | Mediator of RNA polymerase II transcription, subunit 28 homolog (S. cerevisiae)                                                   | 0.50 |
| B3GNT3    | UDP-GlcNAc:betaGal beta-1,3-N-acetylglucosaminyltransferase 3                                                                     | 0.49 |
| HOXD3     | homeobox D3                                                                                                                       | 0.49 |
| RNF125    | ring finger protein 125                                                                                                           | 0.49 |
| HIP1R /// | huntingtin interacting protein 1 related ///                                                                                      |      |
| LOC728014 | 1 related                                                                                                                         | 0.49 |
| PTENP1    | phosphatase and tensin homolog (mutated in multiple advanced cancers 1),                                                          | 0.49 |

|        |                                                             |      |
|--------|-------------------------------------------------------------|------|
|        | pseudogene 1                                                |      |
| NLRP1  | NLR family, pyrin domain containing 1                       | 0.49 |
| FMO5   | flavin containing monooxygenase 5                           | 0.47 |
| GUSBP1 | glucuronidase, beta pseudogene 1                            | 0.47 |
| ABHD6  | abhydrolase domain containing 6                             | 0.47 |
| SRGAP3 | SLIT-ROBO Rho GTPase activating protein 3                   | 0.46 |
| LGR4   | leucine-rich repeat-containing G protein-coupled receptor 4 | 0.45 |
| ZNF358 | zinc finger protein 358                                     | 0.45 |
| IGFBP7 | insulin-like growth factor binding protein 7                | 0.42 |
| C5orf4 | chromosome 5 open reading frame 4                           | 0.40 |
| TBX10  | T-box 10                                                    | 0.39 |
| PDK3   | pyruvate dehydrogenase kinase, isozyme 3                    | 0.38 |
| HYAL1  | hyaluronoglucosaminidase 1                                  | 0.28 |

Supplementary Table 2. List of primers used in real time RT-PCR.

| Gene<br>Symbol<br>(Common<br>Name) | Forward primer (5'→3')               | Reverse primer (5'→3')  | Probe (5'→3')                                   |
|------------------------------------|--------------------------------------|-------------------------|-------------------------------------------------|
| <i>CXCR4</i>                       | CCAGTAGCCACCGCATCT                   | ATAGTCCCCTGAGCCCATTT    |                                                 |
| <i>CXCR7</i>                       | CGCACAGCACAGCCAGGAAG                 | TCGTTCTGAGGCGGGCAATC    |                                                 |
| <i>PPIA</i><br>(cyclophilin A)     | GACGGCGAGCCCTTGG                     | TCTGCTGTCTTTGGGACCTTGT  |                                                 |
| <i>CXCL12α/β</i><br>(SDF-1α/β)     | TGTGCCCTTCAGATTGTAGC                 | CCACTTTAGCTTCGGGTCA     |                                                 |
| <i>GAPDH</i>                       | GAAGGTGAAGGTCGGAGTC                  | GAAGATGGTGATGGGATTTTC   |                                                 |
| 18S rRNA                           | AGGAATTGACGGAAGGGCAC                 | GGACATCTAAGGGCATCACA    |                                                 |
| <i>Luciferase</i>                  | ACTCCTCTGGATCTACTGGTC                | GTAATCCTGAAGGCTCCTCA    |                                                 |
| <i>ICAM1</i>                       | AGCTTCTCCTGCTCTGCAAC                 | GTCTGCTGGGAATTTTCTGG    |                                                 |
| <i>SERPINE1</i><br>(PAI-1)         | GCTGCATGACCTACCAGGA                  | AGCTGCCTGTCTCTCTCACC    |                                                 |
| <i>IL8</i>                         | TGCGCCAACACAGAAATTA                  | CTCTGCACCCAGTTTTCCTT    |                                                 |
| <i>PPP1R15A</i><br>(GADD34)        | CGCCCAGAAACCCCTACTC                  | GCGCACCTTTCTGGCCTT      |                                                 |
| <i>ISG20</i>                       | GGCTACACAATCTACGACACG                | AGGCTGTTCTGGATGCTCTT    |                                                 |
| <i>VEGFA</i>                       | GCA GAC CAA AGA AAG ATA<br>GAC CAA G | CGC CTC GGC TTG TCA CAT | (FAM)-<br>CCCGAGCACGTTGTTC<br>CGTATGGAC-(TAMRA) |
| <i>EDN1</i> (ET-1)                 | TGGACATCATTTGGGTCAACA                | TCTCTTGGACCTAGGGCTTCC   |                                                 |
| <i>TIMP3</i>                       | GAT GCC CCA TGT GCA GTA              | CCC ACC TCT CCA CGA AGT |                                                 |
| <i>F3</i> (Tissue<br>Factor)       | GGAACCCAAACCCGTCAATCA                | CGTCTGCTTCACATCCTTCACAA |                                                 |
|                                    | TGTACAAGAGATAATGCAAACAG              | TCT                     |                                                 |
| <i>TFPI</i>                        | GATT                                 | ATTCCAGGATCTTCTTCCAAAAA |                                                 |
| <i>CXCL11</i> (I-<br>TAC)          | CTACAGTTGTTCAAGGCTTCCC               | G                       |                                                 |
|                                    |                                      | CCACTTTCAGTCTTTTACCCC   |                                                 |
